# Supplementary material for: Theoretical modeling of the L2,3-edge X-ray absorption spectra of Mn(acac)2and Co(acac)2complexes
Source: Royal Society of Chemistry journal article supplement (doi:10.1039/c5cp06844d), 2015-12-08
Supplement: c5cp06844d1.pdf [file c5cp06844d1.pdf]

## A theoretical modeling of the $L_{2,3}$ -edge X-ray absorption spectra of $Mn(acac)_2$ and $Co(acac)_2$ complexes.

Silvia Carlotto,<sup>\*a</sup> Mauro Sambi,<sup>a</sup> Andrea Vittadini<sup>b</sup> and Maurizio Casarin<sup>\*a,b</sup>

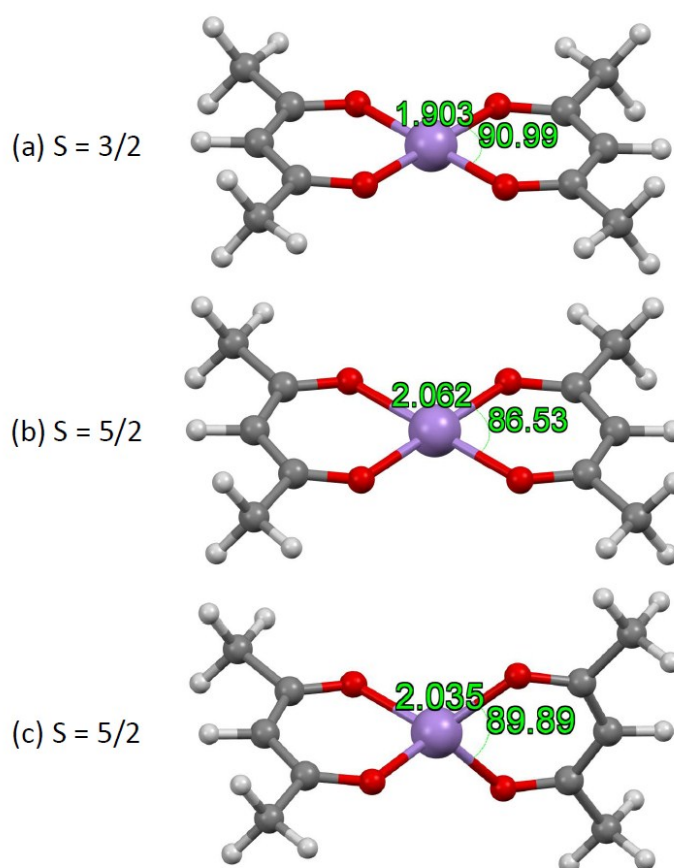

**Figure S1.** B3LYP Optimized geometries for I with a square planar (a) and (b), and a distorted tetrahedral (c) arrangement. Bond lengths are in Å and bond angles are in deg.

[a] Dr. Silvia Carlotto, Prof. Mauro Sambi, Prof. Maurizio Casarin  
Dipartimento di Scienze Chimiche, Università degli Studi di Padova,  
Via F. Marzolo 1 - 35131 Padova, Italy  
E-mail: maurizio.casarin@unipd.it, silvia.carlotto@unipd.it

[b] Dr. Andrea Vittadini, Prof. Maurizio Casarin Istituto per l'Energetica e  
le Interfasi, IENI-CNR via Marzolo 1, 35131 Padova, Italy

**Table S1** Optimized Cartesian Coordinates for I in the  $S=5/2$  (HS) tetrahedral distorted structure.

---

|    |        |        |        |
|----|--------|--------|--------|
| Mn | 0.000  | 0.000  | 0.000  |
| O  | 1.017  | -1.017 | -1.441 |
| O  | -1.017 | 1.017  | -1.441 |
| O  | 1.017  | 1.017  | 1.441  |
| O  | -1.017 | -1.017 | 1.441  |
| C  | 1.766  | -1.766 | -3.554 |
| C  | -1.766 | 1.766  | -3.554 |
| C  | 0.884  | -0.884 | -2.699 |
| C  | -0.884 | 0.884  | -2.699 |
| C  | 0.000  | 0.000  | -3.337 |
| C  | 0.000  | 0.000  | 3.337  |
| C  | 0.884  | 0.884  | 2.699  |
| C  | -0.884 | -0.884 | 2.699  |
| C  | 1.766  | 1.766  | 3.554  |
| C  | -1.766 | -1.766 | 3.554  |
| H  | 2.405  | -1.160 | -4.201 |
| H  | 1.160  | -2.405 | -4.201 |
| H  | 2.389  | -2.389 | -2.916 |
| H  | -1.160 | 2.405  | -4.201 |
| H  | -2.405 | 1.160  | -4.201 |
| H  | -2.389 | 2.389  | -2.916 |
| H  | 0.000  | 0.000  | -4.420 |
| H  | 0.000  | 0.000  | 4.420  |
| H  | 2.405  | 1.160  | 4.201  |
| H  | 1.160  | 2.405  | 4.201  |
| H  | 2.389  | 2.389  | 2.916  |
| H  | -1.160 | -2.405 | 4.201  |
| H  | -2.397 | -1.160 | 4.201  |
| H  | -2.389 | -2.389 | 2.916  |

---

**Table S2** Optimized Cartesian Coordinates for I in the S=5/2 (HS) square planar structure.

---

|    |        |        |        |
|----|--------|--------|--------|
| Mn | 0.000  | 0.000  | 0.000  |
| O  | 1.413  | 1.501  | 0.001  |
| O  | 1.413  | -1.501 | -0.001 |
| O  | -1.413 | 1.501  | -0.001 |
| O  | -1.413 | -1.501 | 0.001  |
| C  | 1.244  | 2.762  | 0.001  |
| C  | 1.244  | -2.762 | -0.001 |
| C  | -1.244 | 2.762  | -0.001 |
| C  | -1.244 | -2.762 | 0.001  |
| C  | 0.000  | 3.409  | 0.000  |
| C  | 0.000  | -3.409 | 0.000  |
| C  | 2.496  | 3.610  | 0.002  |
| C  | 2.496  | -3.610 | -0.002 |
| C  | -2.496 | 3.610  | -0.002 |
| C  | -2.496 | -3.610 | 0.002  |
| H  | 0.000  | 4.491  | 0.000  |
| H  | 0.000  | -4.491 | 0.000  |
| H  | 3.375  | 2.969  | 0.002  |
| H  | 3.375  | -2.969 | -0.002 |
| H  | -3.375 | 2.969  | -0.002 |
| H  | -3.375 | -2.969 | 0.002  |
| H  | 2.520  | 4.257  | 0.882  |
| H  | 2.521  | 4.257  | -0.878 |
| H  | -2.521 | 4.257  | 0.878  |
| H  | -2.520 | 4.257  | -0.882 |
| H  | 2.521  | -4.257 | 0.878  |
| H  | 2.520  | -4.257 | -0.882 |
| H  | -2.520 | -4.257 | 0.882  |
| H  | -2.521 | -4.257 | -0.878 |

---

**Table S3** Optimized Cartesian Coordinates for I in the S=3/2 square planar structure.

---

|    |        |        |        |
|----|--------|--------|--------|
| Mn | 0.000  | 0.000  | 0.001  |
| O  | 1.357  | 1.334  | 0.001  |
| O  | 1.357  | -1.334 | 0.000  |
| O  | -1.357 | 1.334  | 0.000  |
| O  | -1.357 | -1.334 | 0.001  |
| C  | 1.229  | 2.609  | 0.001  |
| C  | 1.229  | -2.609 | 0.000  |
| C  | -1.229 | 2.609  | 0.000  |
| C  | -1.229 | -2.609 | 0.001  |
| C  | 0.000  | 3.271  | 0.000  |
| C  | 0.000  | -3.271 | 0.000  |
| C  | 2.512  | 3.402  | 0.001  |
| C  | 2.512  | -3.402 | -0.001 |
| C  | -2.512 | 3.402  | -0.001 |
| C  | -2.512 | -3.402 | 0.001  |
| H  | 0.000  | 4.353  | 0.000  |
| H  | 0.000  | -4.353 | 0.000  |
| H  | 3.364  | 2.725  | 0.001  |
| H  | 3.364  | -2.725 | -0.001 |
| H  | -3.364 | 2.725  | -0.001 |
| H  | -3.364 | -2.725 | 0.001  |
| H  | 2.568  | 4.047  | 0.881  |
| H  | 2.568  | 4.047  | -0.879 |
| H  | -2.568 | 4.047  | 0.879  |
| H  | -2.567 | 4.047  | -0.881 |
| H  | 2.568  | -4.047 | 0.879  |
| H  | 2.567  | -4.047 | -0.881 |
| H  | -2.567 | -4.047 | 0.881  |
| H  | -2.568 | -4.047 | -0.879 |

---

**Table S4** Optimized Cartesian Coordinates for **II** in the  $S=3/2$  (HS) tetrahedral distorted structure.

---

|    |        |        |        |
|----|--------|--------|--------|
| Co | 0.000  | 0.000  | 0.000  |
| O  | 1.023  | -1.023 | -1.308 |
| O  | -1.023 | 1.023  | -1.308 |
| O  | 1.023  | 1.023  | 1.308  |
| O  | -1.023 | -1.023 | 1.308  |
| C  | 1.762  | -1.762 | -3.429 |
| C  | -1.762 | 1.762  | -3.429 |
| C  | 0.885  | -0.885 | -2.568 |
| C  | -0.885 | 0.885  | -2.568 |
| C  | 0.000  | 0.000  | -3.200 |
| C  | 0.000  | 0.000  | 3.200  |
| C  | 0.885  | 0.885  | 2.568  |
| C  | -0.885 | -0.885 | 2.568  |
| C  | 1.762  | 1.762  | 3.429  |
| C  | -1.762 | -1.762 | 3.429  |
| H  | 2.397  | -1.153 | -4.076 |
| H  | 1.153  | -2.397 | -4.076 |
| H  | 2.389  | -2.389 | -2.798 |
| H  | -1.153 | 2.397  | -4.076 |
| H  | -2.397 | 1.153  | -4.076 |
| H  | -2.389 | 2.389  | -2.798 |
| H  | 0.000  | 0.000  | -4.282 |
| H  | 0.000  | 0.000  | 4.282  |
| H  | 2.397  | 1.153  | 4.076  |
| H  | 1.153  | 2.397  | 4.076  |
| H  | 2.389  | 2.389  | 2.798  |
| H  | -1.153 | -2.397 | 4.076  |
| H  | -2.397 | -1.153 | 4.076  |
| H  | -2.389 | -2.389 | 2.798  |

---

**Table S5.** Energy (eV) , d-composition and MOs for I. Symmetry in parenthesis.

|                             | Energy (eV) | d-composition                 | MOs                                                                                  |
|-----------------------------|-------------|-------------------------------|--------------------------------------------------------------------------------------|
| HOMO<br>(e)                 | -5.6375     | 25.4% $d_{xz}$                | 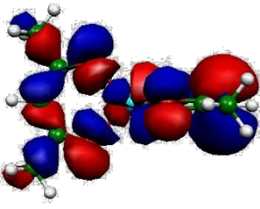   |
|                             |             | 25.4% $d_{yz}$                |    |
| HOMO-1<br>(e)               | -6.4649     | 3.7% $d_{yz}$ + 3.6% $d_{xz}$ |    |
|                             |             | 3.7% $d_{xz}$ + 3.6% $d_{yz}$ |   |
| HOMO-2<br>(a <sub>1</sub> ) | -6.9718     | 58.2% $d_{z^2}$               |  |
| HOMO-3<br>(b <sub>2</sub> ) | -7.5026     | 76.9% $d_{xy}$                |  |
| HOMO-4<br>(b <sub>1</sub> ) | -7.7019     | 81.6% $d_{x^2-y^2}$           |  |

---

|                             |         |                                               |                                                                                     |
|-----------------------------|---------|-----------------------------------------------|-------------------------------------------------------------------------------------|
| HOMO-5<br>(a <sub>1</sub> ) | -8.1900 | 11 % d <sub>xy</sub>                          | 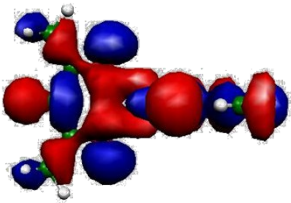  |
| HOMO-6<br>(e)               | -8.3462 | 21.7% d <sub>yz</sub> + 20.6% d <sub>xz</sub> |   |
|                             |         | 21.7% d <sub>xz</sub> + 20.6% d <sub>yz</sub> |   |
| HOMO-7<br>(a <sub>1</sub> ) | -9.0594 | 37.8% d <sub>z2</sub>                         |  |

---

**Table S6.** Energy (eV) , d-composition and MOs for II. Symmetry in parenthesis.

|                             | Energy (eV) | d-composition                  | MOs                                                                                  |
|-----------------------------|-------------|--------------------------------|--------------------------------------------------------------------------------------|
| HOMO<br>(e)                 | -6.1025     | 11.3% $d_{yz}$ + 0.6% $d_{xz}$ | 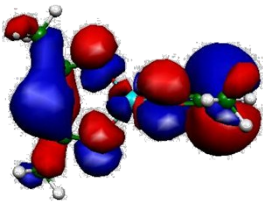   |
|                             |             | 11.3% $d_{xz}$ + 0.6% $d_{yz}$ |    |
| HOMO-1<br>(e)               | -6.7317     | 9% $d_{yz}$ + 2.2% $d_{xz}$    |    |
|                             |             | 9% $d_{xz}$ + 2.2% $d_{yz}$    |   |
| HOMO-2<br>(a <sub>1</sub> ) | -7.4872     | 50.1% $d_{z^2}$                |  |
| HOMO-3<br>(a <sub>1</sub> ) | -8.1070     | 10.2% $d_{xy}$                 |  |
| HOMO-4<br>(b <sub>1</sub> ) | -8.1655     | 73% $d_{x^2-y^2}$              |  |



---

|                             |         |                                               |                                                                                     |
|-----------------------------|---------|-----------------------------------------------|-------------------------------------------------------------------------------------|
| HOMO-5<br>(b <sub>2</sub> ) | -9.0431 | 61.3% d <sub>xy</sub>                         | 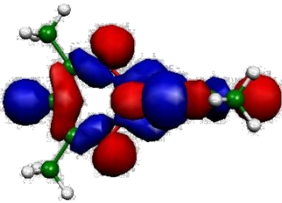  |
| HOMO-6<br>(e)               | -9.2354 | 25.7% d <sub>yz</sub> + 19.4% d <sub>xz</sub> |   |
|                             |         | 25.7% d <sub>xz</sub> + 19.4% d <sub>yz</sub> |   |
| HOMO-7<br>(a <sub>1</sub> ) | -9.3752 | 45% d <sub>z2</sub>                           |  |

---
